# Supplementary material for: Substituent effects on keto–enol tautomerization of β-diketones from X-ray structural data and DFT calculations
Source: Royal Society of Chemistry journal article supplement (doi:10.1039/b714708b), 2008-01-01
Supplement: b714708b.pdf [file b714708b.pdf]

# **Substituent effects on keto-enol tautomerization of $\beta$ -diketones from X-ray structural data and DFT calculations.**

**Valerio Bertolasi,<sup>\*a</sup> Valeria Ferretti,<sup>a</sup> Paola Gilli,<sup>a</sup> Xiaoquan Yao<sup>b</sup> and Chao-Jun Li<sup>b</sup>**

## **Supplementary Data**

**Table S1.** REFCODEs and intramolecular O...O H-bond distances (Å) for  $\beta$ -keto-enols of Class I. (1a-1j) refer to the structures of acetylacetone or compounds forming co-crystals containing molecules of acetylacetone).

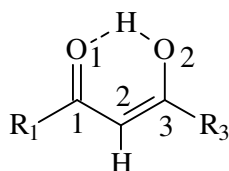

R<sub>1</sub>, R<sub>3</sub> = any substituent  
 linked by a Carbon atom

| Structure | REFCODE  | d o...o      |
|-----------|----------|--------------|
| 1a        | LIWPIQ   | 2.541        |
| 1b        | LIWPIQ01 | 2.547        |
| 1c        | ACAGAN   | 2.507; 2.536 |
| 1d        | DPHEAD10 | 2.535        |
| 1e        | DPHEAD20 | 2.536        |
| 1f        | HADJUS   | 2.509        |
| 1g        | HADKAZ   | 2.517; 2.528 |
| 1h        | IBOWAX   | 2.474        |
| 1i        | QASGAS   | 2.488; 2.515 |
| 1j        | TITZEB   | 2.493        |
| 2         | AGIFAX   | 2.501; 2.478 |
| 3         | AHEQOT   | 2.498        |
| 4a        | APUSAF   | 2.464        |
| 4b        | APUSAF01 | 2.444        |
| 5         | AVABEE   | 2.488        |
| 6         | BEMCAX   | 2.516        |
| 7         | BILWEZ   | 2.516        |
| 8         | BILWID   | 2.534        |
| 9a        | BINMEQ   | 2.447        |
| 9b        | BINMEQ01 | 2.454        |
| 10        | BOLZAD   | 2.485        |
| 11        | BOLZEH   | 2.495        |
| 12        | BPBUDO   | 2.482        |
| 13        | BUWKUZ   | 2.514        |
| 14a       | BZOYAC   | 2.497        |
| 14b       | BZOYAC01 | 2.485        |
| 14c       | BZOYAC02 | 2.493        |
| 14d       | BZOYAC03 | 2.500        |
| 14e       | BZOYAC04 | 2.502        |
| 14f       | BZOYAC05 | 2.499        |
| 14g       | BZOYAC06 | 2.501        |
| 15a       | CACBAK   | 2.509        |
| 15b       | CACBAK01 | 2.495; 2.505 |
| 16        | CEBMOL   | 2.511        |

|            |          |              |
|------------|----------|--------------|
| <b>17</b>  | CESMIW   | 2.485        |
| <b>18</b>  | DAMTAM   | 2.495        |
| <b>19a</b> | DBEZLM   | 2.460        |
| <b>19b</b> | DBEZLM01 | 2.461        |
| <b>19c</b> | DBEZLM02 | 2.459        |
| <b>19d</b> | DBEZLM03 | 2.452        |
| <b>19e</b> | DBEZLM04 | 2.461        |
| <b>19f</b> | DBEZLM05 | 2.459        |
| <b>20</b>  | DEBFEV   | 2.561; 2.565 |
| <b>21</b>  | DEJYOH   | 2.488        |
| <b>22</b>  | DUKRUW   | 2.557; 2.562 |
| <b>23</b>  | EMUPAD   | 2.562        |
| <b>24a</b> | EVEXAE   | 2.434        |
| <b>24b</b> | EVEXAE01 | 2.439        |
| <b>24c</b> | EVEXAE01 | 2.448        |
| <b>25</b>  | EYIZER   | 2.541        |
| <b>26</b>  | EYIZIV   | 2.472        |
| <b>27</b>  | FAXWAD   | 2.436        |
| <b>28</b>  | FIPXEH   | 2.518; 2.526 |
| <b>29</b>  | FIZWER   | 2.504        |
| <b>30a</b> | FOLHAP   | 2.496        |
| <b>30b</b> | FOHLAP01 | 2.493        |
| <b>31</b>  | FULCEU   | 2.553        |
| <b>32</b>  | GANJAG   | 2.508        |
| <b>33</b>  | HANHOU   | 2.500        |
| <b>34</b>  | HECGIF   | 2.536        |
| <b>35</b>  | HUZGAK   | 2.498        |
| <b>36</b>  | JERWIN   | 2.471; 2.526 |
| <b>37</b>  | JITVUD   | 2.465        |
| <b>38</b>  | JITWAX   | 2.470        |
| <b>39</b>  | JITWEO   | 2.461        |
| <b>40</b>  | JITWIS   | 2.502        |
| <b>41</b>  | JITWOY   | 2.492        |
| <b>42a</b> | JITWUE   | 2.554        |
| <b>42b</b> | JITWUE01 | 2.558        |
| <b>42c</b> | JITWUE02 | 2.559        |
| <b>42d</b> | JITWUE03 | 2.558        |
| <b>42e</b> | JITWUE04 | 2.556        |
| <b>43</b>  | JITXAL   | 2.432, 2.434 |
| <b>44</b>  | JITXEP   | 2.499        |
| <b>45</b>  | JUDBIT   | 2.461        |
| <b>46</b>  | JUJTIR   | 2.541        |
| <b>47</b>  | KASPOK   | 2.459        |
| <b>48</b>  | KATJIZ   | 2.495        |
| <b>49</b>  | KAWXEL   | 2.516        |
| <b>50</b>  | KAZKIF   | 2.490        |
| <b>51</b>  | KEHZEC   | 2.514; 2.517 |
| <b>52</b>  | KEMQUO   | 2.452        |
| <b>53</b>  | KIQLUR   | 2.551        |
| <b>54a</b> | KOJYEN   | 2.487        |
| <b>54b</b> | KOJYEN02 | 2.473        |

|            |                                                   |                            |
|------------|---------------------------------------------------|----------------------------|
| <b>55</b>  | KOJYIR                                            | 2.539                      |
| <b>56</b>  | KUGRIN                                            | 2.471                      |
| <b>57</b>  | LEPLIC                                            | 2.543                      |
| <b>58</b>  | LEPLOI                                            | 2.509; 2.512               |
| <b>59</b>  | LEPLUO                                            | 2.552                      |
| <b>60</b>  | LIKBAI                                            | 2.509                      |
| <b>61</b>  | LUQLEO                                            | 2.464                      |
| <b>62</b>  | LUQLOY                                            | 2.452                      |
| <b>63</b>  | NAMFUD                                            | 2.512                      |
| <b>64</b>  | NENLOI                                            | 2.444                      |
| <b>65</b>  | NPBUDO                                            | 2.459                      |
| <b>66</b>  | OKEREB                                            | 2.534                      |
| <b>67</b>  | QEMREF                                            | 2.546                      |
| <b>68</b>  | RIMFUO                                            | 2.519; 2.523               |
| <b>69</b>  | SARHUP                                            | 2.481                      |
| <b>70</b>  | SEBVOL                                            | 2.525; 2.539; 2.541; 2.555 |
| <b>71</b>  | TALJEV                                            | 2.540                      |
| <b>72</b>  | THTFBD                                            | 2.522; 2.551               |
| <b>73</b>  | TOLACP10                                          | 2.455                      |
| <b>74</b>  | TUBYOE                                            | 2.459                      |
| <b>75</b>  | UGOLEH                                            | 2.524                      |
| <b>76</b>  | VIDREF                                            | 2.535                      |
| <b>77</b>  | VOKQAN                                            | 2.479                      |
| <b>78</b>  | WEBGAL                                            | 2.473                      |
| <b>79a</b> | WIDCER                                            | 2.531; 2.535               |
| <b>79b</b> | WIDCER01                                          | 2.533                      |
| <b>80</b>  | WIDCIV                                            | 2.449                      |
| <b>81</b>  | XEDHAQ                                            | 2.506                      |
| <b>82</b>  | XEGXEM                                            | 2.462                      |
| <b>83</b>  | XEPJIL                                            | 2.538                      |
| <b>84</b>  | XEPJOR                                            | 2.511                      |
| <b>85</b>  | XEYRUO                                            | 2.559                      |
| <b>86</b>  | XEYSEZ                                            | 2.491; 2.514               |
| <b>87</b>  | YAVROC                                            | 2.515; 2.530               |
| <b>88</b>  | YEBQUS                                            | 2.548                      |
| <b>89</b>  | Bouhaine et al. Acta Cryst.<br>(2006) E62, o5401  | 2.456                      |
| <b>90</b>  | Wang et al. Acta Cryst.<br>(2007) E63, o296       | 2.490                      |
| <b>91</b>  | Zheng et al. Acta Cryst.<br>(2007) E63, o396      | 2.486                      |
| <b>92</b>  | Parimita et al. Acta Cryst.<br>(2007) ) E63, o860 | 2.455                      |
| <b>93</b>  | Zheng et al. Acta Cryst.<br>(2007) E63, o966      | 2.503, 2.518               |
